# Supplementary material
Source: MDPI journal article supplement (https://www.mdpi.com/2076-3417/12/14/7331)
Supplement: s1 [file s1]

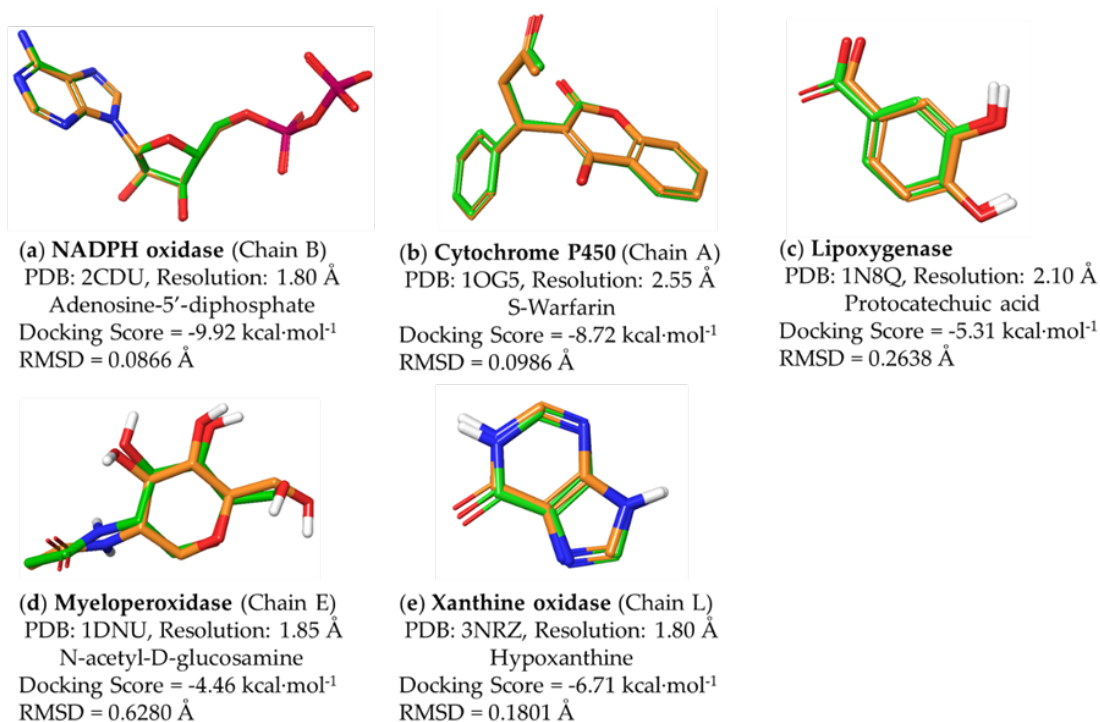

**Figure S1.** The similarity in the overlaps between crystallographic (green) and docked (orange) poses, derived from the following examined molecular targets: (a) NADPH oxidase (NO), (b) cytochrome P450 (CP450), (c) lipoxxygenase (LO), (d) myeloperoxidase (MP) and (e) xanthine oxidase (XO) enzymes.

**Table S1:** Percentage relative intensities of ATR-FTIR spectra bands of the flower samples.

|                  | 1             | 2             | 3             | 4             | 5             | 6             | 7            | 8            | 9            | 10            | 11           | 12           | 13           | 14            | 15           | 16           | 17           | 18           | 19           | 20            | 21           | 22           | 23           | 24            | 25           |
|------------------|---------------|---------------|---------------|---------------|---------------|---------------|--------------|--------------|--------------|---------------|--------------|--------------|--------------|---------------|--------------|--------------|--------------|--------------|--------------|---------------|--------------|--------------|--------------|---------------|--------------|
| <b>3200–3300</b> | 15.30         | 31.20         |               |               | 52.10         | 23.40         | 12.50        | 67.50        | 12.40        |               | 23.20        | 21.20        | 12.20        | 12.80         |              | 15.50        | 33.20        | 12.10        | 12.80        | 12.60         |              |              |              |               |              |
| <b>2920-2940</b> | 73.20         | <b>98.20</b>  | 33.20         | 32.10         | 21.20         | <b>82.10</b>  | <b>92.10</b> | <b>93.80</b> | <b>98.40</b> |               | <b>92.10</b> | 34.50        | <b>99.80</b> | 11.20         | <b>99.90</b> | <b>93.20</b> | <b>99.40</b> | <b>91.30</b> | <b>10.10</b> | <b>93.20</b>  | <b>91.20</b> | <b>92.10</b> |              | <b>91.20</b>  | 61.40        |
| <b>1700-1740</b> | <b>92.10</b>  |               | <b>93.20</b>  |               |               | 12.30         |              | 10.20        | <b>91.20</b> |               |              |              |              |               |              | 15.20        |              |              |              | 54.20         |              |              | <b>99.20</b> |               |              |
| <b>1640-1680</b> | 21.30         | 23.20         |               |               | 88.30         |               |              |              |              | 21.20         |              |              |              |               |              | 12.50        | 23.20        |              | <b>99.20</b> |               |              |              |              | 54.30         |              |
| <b>1510-1610</b> | 23.20         | <b>99.80</b>  | <b>95.20</b>  | <b>101.20</b> | <b>99.80</b>  | <b>101.20</b> | <b>99.90</b> | 23.40        | <b>99.90</b> | <b>100.80</b> | <b>99.90</b> | <b>99.80</b> | <b>93.20</b> | <b>101.20</b> | <b>91.30</b> | <b>99.80</b> | 33.20        | 32.10        | 32.10        | <b>101.20</b> | <b>99.80</b> | <b>99.90</b> | <b>87.20</b> | <b>101.20</b> | <b>99.90</b> |
| <b>1430–1470</b> | 53.20         |               | <b>91.20</b>  |               | <b>83.20</b>  | 56.40         |              | <b>97.20</b> | 72.30        |               |              |              |              |               |              |              |              |              |              |               |              |              | 29.20        |               |              |
| <b>1390-1410</b> |               |               |               |               | 12.10         |               | <b>92.30</b> |              | 12.80        |               | 69.80        | 34.20        | 22.10        |               | 34.50        | 14.20        |              | 18.30        |              | <b>99.20</b>  |              |              | <b>98.20</b> | 74.20         | <b>91.20</b> |
| <b>1350-1380</b> |               |               |               | 66.10         | <b>94.50</b>  |               |              |              | 12.30        | <b>92.10</b>  | 72.30        |              | 31.20        |               |              |              |              |              |              |               |              |              | 33.20        |               |              |
| <b>1330-1350</b> | <b>99.40</b>  | 71.20         | <b>101.20</b> |               |               | <b>93.40</b>  |              | <b>93.20</b> |              |               |              |              |              |               |              | 32.50        |              |              | 33.20        |               |              | 12.40        |              | 10.20         |              |
| <b>1280-1310</b> |               | 31.20         |               | 67.30         | <b>100.10</b> |               |              |              | 32.30        | 23.90         | 19.10        |              |              |               |              |              |              | 54.20        |              |               |              |              | 33.20        |               |              |
| <b>1220-1270</b> |               |               |               | <b>93.20</b>  | 73.20         | 22.10         | <b>80.20</b> |              | 22.50        | <b>93.20</b>  |              |              | 21.20        | 32.10         | 33.20        | 66.20        | 32.50        | 11.20        | 38.70        | 21.40         | 53.20        | 32.10        |              | 76.20         | <b>83.30</b> |
| <b>1180-1210</b> | <b>98.20</b>  |               | <b>99.20</b>  | 12.20         | <b>92.10</b>  |               | <b>83.20</b> | <b>99.80</b> | 23.40        |               | 32.10        |              |              |               |              |              |              |              | 12.90        | 53.20         |              |              | 23.20        |               |              |
| <b>1140-1160</b> | 26.40         |               |               |               | 60.10         |               |              |              | 32.10        | 76.20         |              |              |              |               |              | 38.90        |              |              |              |               |              | 11.30        |              |               | 40.20        |
| <b>1090-1110</b> |               |               |               | <b>93.20</b>  | <b>99.40</b>  |               | 34.50        |              |              | 34.50         |              |              | 15.30        |               |              |              |              |              |              | 12.70         |              |              |              | 31.20         |              |
| <b>1040-1060</b> | <b>101.30</b> |               | 23.40         | 52.10         | <b>83.20</b>  | 51.20         | 33.20        |              | <b>87.70</b> | <b>91.20</b>  | <b>95.40</b> | 45.20        | 52.10        |               |              |              | 65.20        | 51.20        | 50.40        | 71.20         | 32.10        |              |              |               | 32.10        |
| <b>1020-1030</b> | 33.20         | <b>102.10</b> | 20.10         | 18.90         | 28.20         | <b>90.20</b>  | <b>98.30</b> | 20.20        |              | 23.40         |              | <b>97.20</b> | <b>99.20</b> | <b>91.30</b>  | 33.20        | 15.10        | <b>90.40</b> | <b>81.20</b> | 58.30        | 59.20         | <b>90.20</b> | <b>92.40</b> | 42.20        | <b>99.30</b>  | 21.40        |
| <b>960-970</b>   | 18.30         |               |               |               | 24.60         | 22.30         | 67.80        |              | 38.30        | 22.40         | 55.60        | 33.80        | 22.60        | 43.20         | 33.40        | 37.30        | 35.60        | <b>99.80</b> | 45.30        | 18.90         | 37.20        | 45.60        | 28.60        | <b>93.20</b>  | 11.00        |
| <b>840-890</b>   | 33.20         | 16.10         | 38.30         | 17.80         | 12.90         | 44.80         | 33.20        | 35.30        | 33.20        | 19.20         | 35.60        | 56.30        | 23.20        | 33.20         | 45.60        | 14.60        | 33.20        | <b>81.20</b> | 25.60        | 23.60         | 33.70        | 40.20        | 35.60        | 37.30         | 18.20        |
| <b>810-840</b>   | 57.20         | 63.20         | 51.40         | 71.30         | <b>88.10</b>  | 71.30         | <b>91.30</b> | 63.20        | 65.10        | <b>92.10</b>  | 53.20        | 62.10        | 21.30        | 66.10         | 45.10        | 39.20        | 69.10        | 23.20        | 41.20        | 71.40         | 51.30        | 52.30        | 31.20        | 63.60         | 38.20        |
| <b>760-810</b>   | 52.30         | 52.10         | <b>82.10</b>  | 22.10         | 23.20         | <b>88.30</b>  | 73.20        | <b>89.20</b> | 76           | 32.10         | 52.10        | 77.10        | 52.30        | 68.40         | 59.10        | 63.10        | 72.10        |              | 67.10        | 69.90         | 62.10        | 62.10        | 18.30        | 25.20         | 41.40        |
| <b>680-730</b>   |               |               |               |               | 53.20         |               |              |              |              |               | 10.30        |              |              |               | 52.10        |              |              | 25.60        | 15.30        |               |              |              |              |               |              |
